# Supplementary material for: Psychotropic Polypharmacy for the Treatment of Bipolar Disorder in Taiwan
Source: Atypon-hosted journal article supplement (doi:10.1176/appi.ps.201200529), 2014-01-01
Supplement: 125_ds001.pdf [file 125_ds001.pdf]

**Supplement: medication list**

*Antidepressants* include sertraline, fluoxetine, trazodone, venlafaxine, paroxetine, citalopram, mirtazapine, imipramine, fluvoxamine, moclobemide, doxepin, maprotiline, escitalopram, amitriptyline, duloxetine, milnacipran, clomipramine, and dosulepin.

*Antipsychotics* include quetiapine, olanzapine, zotepine, clozapine, amisulpride, aripiprazole, ziprasidone, sulpiride, haloperidol, chlorpromazine, clotiapine, thioridazine, flupentixol, chlorprothixene, clopenthixol, loxapine, trifluoperazine, zuclopenthixol, perphenazine, tiotixene, pimozide, and pipotiazine.

*Mood stabilizers* include carbamazepine, gabapentin, lamotrigine, lithium, oxcarbazepine, topiramate and valproic acid.
